# Supplementary material for: Retinal Pigment Epithelial Cells Derived from Induced Pluripotent Stem (iPS) Cells Suppress or Activate T Cells via Costimulatory Signals
Source: PubMed Central journal article supplement (PMC7554762; doi:10.3390/ijms21186507), 2020-09-05
Supplement: ijms-21-06507-s001.pdf [file ijms-21-06507-s001.pdf]

Supplementary materials

Fig. S1.

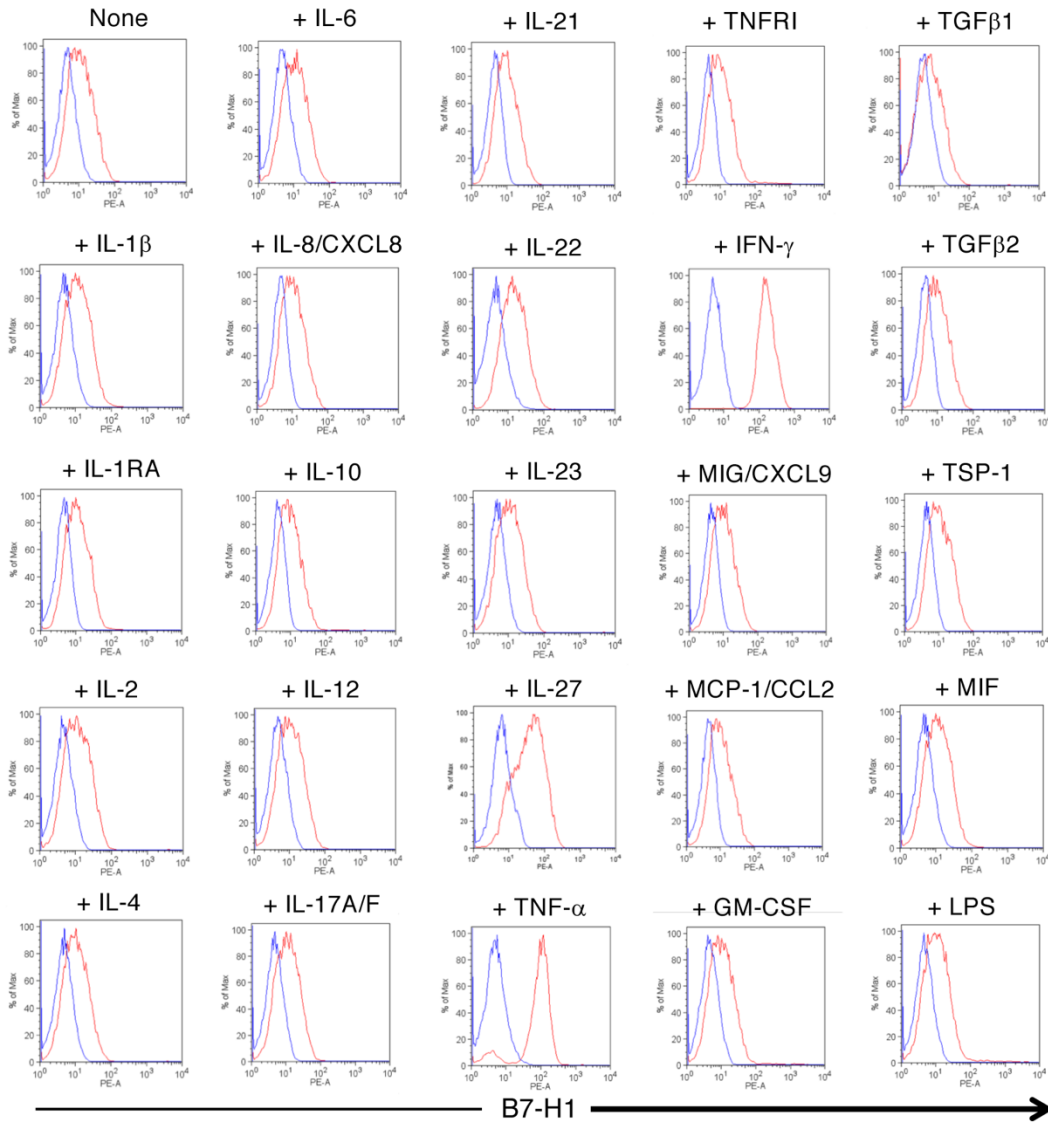

**Fig. S1. Expression of B7-H1/CD274 on human iPS-RPE cells in the presence of inflammatory proteins.**

To confirm the expression of B7-H1/CD274 on human iPS-RPE cells, human recombinant proteins such as IL-1 $\beta$ , IL-1RA, IL-2, IL-4, IL-6, IL-8, IL-10, IL-12, IL-17A/F, IL-21, IL-22, IL-23, IL-27, TNF- $\alpha$ , TNFR1, IFN- $\gamma$ , MIG, MCP-1, GM-SCF, TGF $\beta$ 1, TGF $\beta$ 2, TSP-1, MIF, and LPS were used prior to FACS analysis. As a result, iPS-RPE cells exposed to IFN- $\gamma$ , TNF- $\alpha$ , and IL-27 had inducibly expressed B7-H1. Blue histogram: data for isotype control. TSP-1: thrombospondin-1; MI: macrophage migration inhibitory factor; LPS: lipopolysaccharide.

**Fig. S2.**

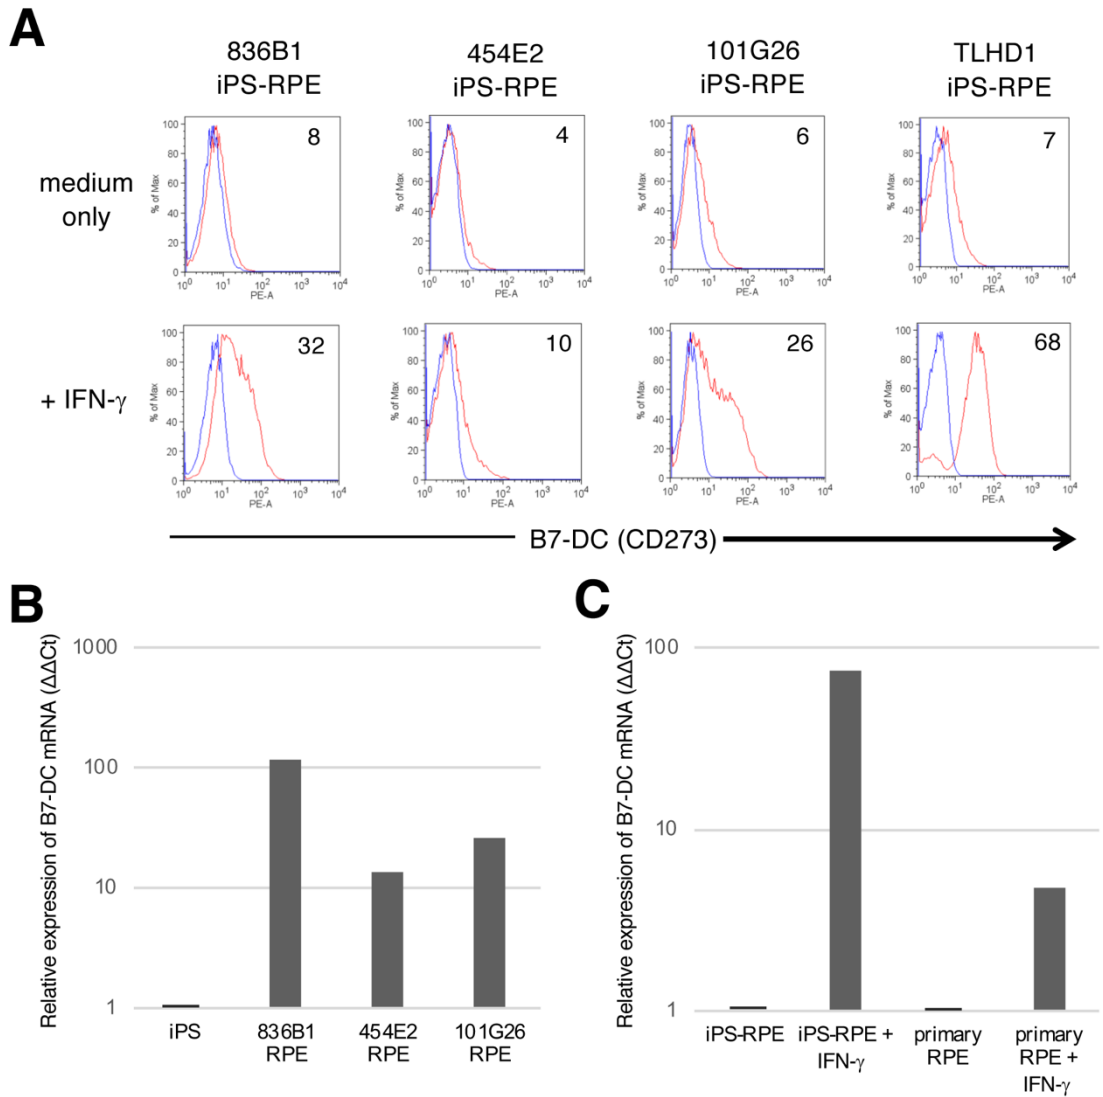

**Fig. S2. Expression of B7-DC/CD273 on human iPS-RPE cells.**

We examined whether iPS-RPE cells expressed B7-DC. **(A)** In FACS results, iPS-RPE cells poorly expressed B7-DC. However, IFN- $\gamma$ -pretreated iPS-RPE cells clearly expressed it. The numbers in the histograms indicate MFI. Blue histogram: data for isotype control. **(B)** In qRT-PCR, iPS-RPE cells expressed mRNA for B7-DC compared with control iPS cells. **(C)** In addition, IFN- $\gamma$ -pretreated iPS-RPE cells, as well as primary RPE cells, highly expressed the molecules compared with non-treated RPE cells. These results suggest that RPE cells express the co-stimulatory molecules, especially under inflammatory conditions.

**Fig. S3.**

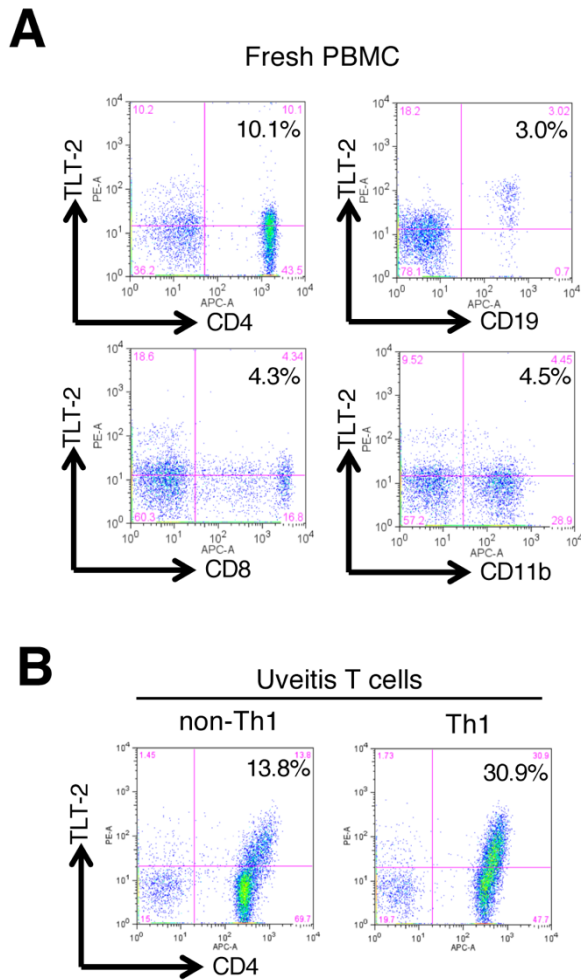

**Fig. S3. Expression of TLT-2 on T cells.**

(A) FACS showed that T cells (CD4 and CD8), monocytes/macrophages (CD11b), and B cells (CD19) in PBMC from a healthy donor expressed TLT-2 receptor, especially CD4<sup>+</sup> T cells. (B) In addition, non-Th1-type CD4<sup>+</sup> T cells from a VKH uveitis patient expressed TLT-2. However, Th1-type CD4<sup>+</sup> T cells from the patient highly expressed TLT-2 on their surfaces. Numbers in the histograms indicate the percentage of cells double-positive (e.g., CD4 and TLT-2). TLT-2: triggering receptor expressed on myeloid cell-like transcript 2.

Fig. S4.

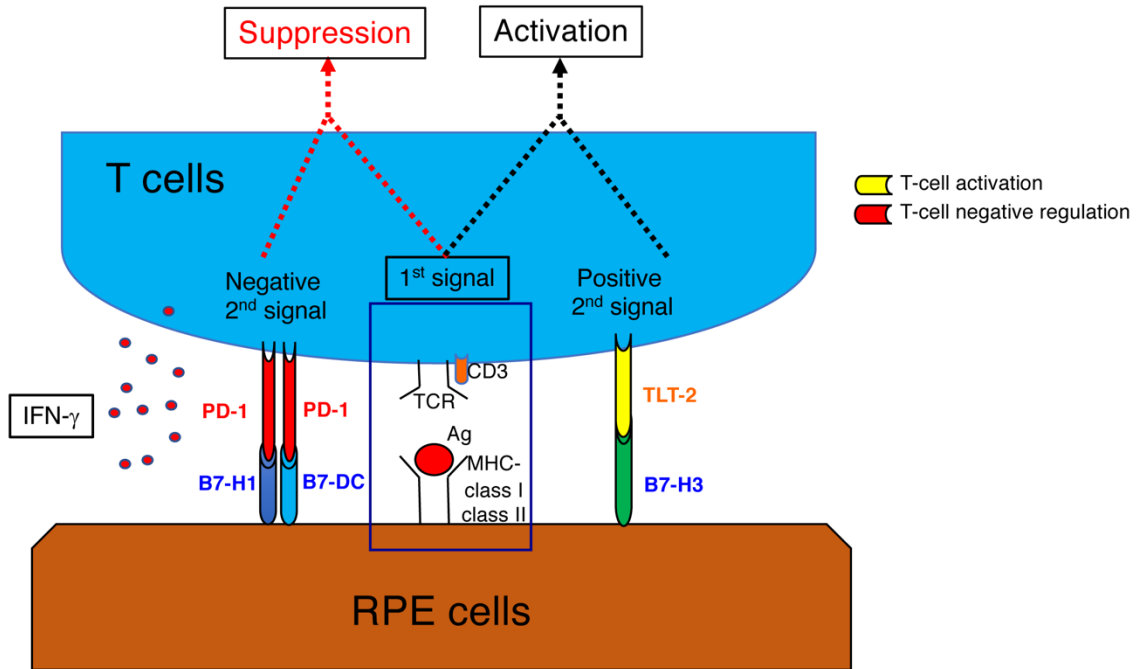

Fig. S4. Summary of the relationship between RPE cells and T cells with 2<sup>nd</sup> co-stimulatory signals.

The first signal is the interaction of the T-cell receptor (TCR) with antigen (Ag) peptide-MHC complexes presented by RPE cells. B7-H3 co-stimulatory molecules on RPE cells are able to activate/stimulate T cells through receptors such as TLT-2. By contrast, B7-H1/B7-DC negative co-stimulatory molecules on RPE cells are able to suppress bystander T cells through the PD-1 receptor. IFN- $\gamma$  cytokines secreted by T cells, especially Th1 cells, are necessary for the interaction. The first signal (MHC-TCR complex) is required for T-cell regulation together with these 2<sup>nd</sup> co-stimulatory signals.

**Table S1. Antibody information**

| No. | Antibody                           | Species | Concentration | Application / Tested cells      | Source          |
|-----|------------------------------------|---------|---------------|---------------------------------|-----------------|
| 1   | anti-human CD3                     | Mouse   | 1 µg/mL       | <i>In vitro</i> assay / T cells | Ancell          |
| 2   | anti-human CD4, APC                | Mouse   | 2 µl/test     | FACS / T cells, PBMC            | Miltenyi Biotec |
| 3   | anti-human CD8a, APC               | Mouse   | 5 µl/test     | FACS / T cells, PBMC            | eBioscience     |
| 4   | anti-human CD11b, APC              | Rat     | 2 µl/test     | FACS / monocytes, PBMC          | Miltenyi Biotec |
| 5   | anti-human CD19, APC               | Mouse   | 10 µl/test    | FACS / B cells, PBMC            | BD PharMingen   |
| 6   | anti-human IFN-γ, PE               | Mouse   | 10 µl/test    | FACS / T cells                  | R&D systems     |
| 7   | anti-human CD40, PE                | Mouse   | 5 µl/test     | FACS / RPE ells                 | BioLegend       |
| 8   | anti-human ICAM-1/CD54, FITC       | Mouse   | 10 µl/test    | FACS / RPE ells                 | R&D systems     |
| 9   | anti-human CD70 (CD27-L), PE       | Mouse   | 5 µl/test     | FACS / RPE ells                 | BioLegend       |
| 10  | anti-human CD80 (B7-1), FITC       | Mouse   | 5 µl/test     | FACS / RPE ells                 | eBioscience     |
| 11  | anti-human CD86 (B7-2), FITC       | Mouse   | 5 µl/test     | FACS / RPE ells                 | eBioscience     |
| 12  | anti-human CD252 (OX40L), PE       | Mouse   | 5 µl/test     | FACS / RPE ells                 | BioLegend       |
| 13  | anti-human CD270 (HVEM), PE        | Mouse   | 5 µl/test     | FACS / RPE ells                 | BioLegend       |
| 14  | anti-human CD273 (B7-DC), PE       | Mouse   | 5 µl/test     | FACS / RPE ells                 | eBioscience     |
| 15  | anti-human CD274 (B7-H1), PE       | Mouse   | 5 µl/test     | FACS / RPE ells                 | eBioscience     |
| 16  | anti-human CD274 (B7-H1), purified | Rat     | ×100          | Immunohistochemistry / RPE      | eBioscience     |
| 17  | anti-human CD275 (B7-H2), PE       | Mouse   | 5 µl/test     | FACS / RPE cells                | eBioscience     |
| 18  | anti-human CD276 (B7-H3), PE       | Mouse   | 5 µl/test     | FACS / RPE cells                | BioLegend       |
| 19  | anti-human CD276 (B7-H3), purified | Mouse   | 1 µg/ml       | <i>In vitro</i> assay           | BioLegend       |
| 20  | anti-human CD276 (B7-H3), purified | Goat    | ×100          | Immunohistochemistry / RPE      | R&D systems     |
| 21  | anti-human B7-H4, PE               | Mouse   | 5 µl/test     | FACS / RPE cells                | eBioscience     |

|    |                                      |        |            |                                         |                 |
|----|--------------------------------------|--------|------------|-----------------------------------------|-----------------|
| 22 | anti-human Fas ligand (TNFSF6), PE   | Mouse  | 5 µl/test  | FACS / RPE cells                        | BioLegend       |
| 23 | anti-human 4-1BB-L (TNFSF9), PE      | Mouse  | 10 µl/test | FACS / RPE cells                        | R&D systems     |
| 24 | anti-human GITRL (TNFSF18), PE       | Mouse  | 10 µl/test | FACS / RPE cells                        | R&D systems     |
| 25 | anti-human PD-1 (CD279), PE          | Mouse  | 10 µl/test | FACS / T cells, PBMC                    | BD PharMingen   |
| 26 | anti-human PD-1 (CD279), purified    | Mouse  | 1 µg/ml    | <i>In vitro</i> assay                   | BD PharMingen   |
| 27 | anti-human TLT-2, PE                 | Mouse  | 5 µl/test  | FACS / T cells, PBMC                    | BioLegend       |
| 28 | anti-human Ki-67, PE                 | Mouse  | 5 µl/test  | FACS / T cells, PBMC                    | BioLegend       |
| 29 | anti-rat IgG, Alexa Fluor 546        | Goat   | ×1000      | Immunohistochemistry (2nd abs) / RPE    | Invitrogen      |
| 30 | anti-goat IgG, Alexa Fluor 488       | Donkey | ×1000      | Immunohistochemistry (2nd abs) / RPE    | Invitrogen      |
| 31 | 4',6-diamidino-2-phenylindole (DAPI) | -      | ×1000      | Immunohistochemistry (counterstaining)  | Invitrogen      |
| 32 | mouse IgG1κ, purified                | -      | 1 µg/ml    | <i>In vitro</i> assay (isotype control) | BD PharMingen   |
| 33 | mouse IgG1κ, purified                | -      | 1 µg/ml    | <i>In vitro</i> assay (isotype control) | BioLegend       |
| 34 | mouse IgG, PE                        | -      | 5 µl/test  | FACS / T cells, PBMC                    | BioLegend       |
| 35 | mouse IgG, PE                        | -      | 5 µl/test  | FACS / RPE cells                        | BioLegend       |
| 36 | mouse IgG, PE                        | -      | 5 µl/test  | FACS / RPE cells                        | eBioscience     |
| 37 | mouse IgG, FITC                      | -      | 10 µl/test | FACS / RPE cells                        | R&D systems     |
| 38 | mouse IgG, PE                        | -      | 10 µl/test | FACS / T cells                          | R&D systems     |
| 39 | mouse IgG, APC                       | -      | 2 µl/test  | FACS / T cells, PBMC                    | Miltenyi Biotec |
| 40 | mouse IgG, APC                       | -      | 10 µl/test | FACS / B cells, PBMC                    | BD PharMingen   |
| 41 | anti-human IL-4                      | Rat    | 5 µg/mL    | <i>In vitro</i> assay / T cells         | eBioscience     |

**Table S2. Primers and probes for qRT-PCR**

| <b>No.</b> | <b>Molecule</b>                                      | <b>Left primer</b>     | <b>Right primer</b>      | <b>Probe*</b> |
|------------|------------------------------------------------------|------------------------|--------------------------|---------------|
| 1          | actin, beta ( $\beta$ -actin)                        | ccaaccgcgagaagatga     | ccagaggcgtacagggatag     | #64           |
| 2          | programmed cell death 1 ligand 1 (PD-L1/B7-H1/CD274) | ccatacagetgaattggtcatc | cagaattaccaagtgagtccttca | #88           |
| 3          | programmed cell death 1 (PDCD1: PD-1)                | ctccaggcatgcagatcc     | ggcctgtctggggagtcta      | #26           |
| 4          | CD276 molecule (B7-H3)                               | tgggagcactgtggttctg    | agtgccaccactgggtctt      | #85           |
| 5          | programmed cell death 1 ligand 2 (PD-L2/B7-DC/CD273) | gagctgtggcaagtctcat    | gcaattccaggctcaacatta    | #69           |

\*Probe - The probe in the Roche Universal Probe Library was used for qRT-PCR assay.

**Table S3. Recombinant human proteins**

| <b>No.</b> | <b>Recombinant protein</b>      | <b>Concentration</b>  | <b>Application / Tested cells</b>                | <b>Source</b>  |
|------------|---------------------------------|-----------------------|--------------------------------------------------|----------------|
| 1          | recombinant human IL-2          | 100 U/ml              | <i>In vitro</i> assay / T cells, PBMC, RPE cells | BD Biosciences |
| 2          | recombinant human IL-1 $\beta$  | 50 ng/ml              | <i>In vitro</i> assay / RPE cells                | R&D systems    |
| 3          | recombinant human IL-1RA        | 50 ng/ml              | <i>In vitro</i> assay / RPE cells                | R&D systems    |
| 4          | recombinant human IL-4          | 50 ng/ml              | <i>In vitro</i> assay / RPE cells                | BD PharMingen  |
| 5          | recombinant human IL-6          | 50 ng/ml              | <i>In vitro</i> assay / RPE cells                | R&D systems    |
| 6          | recombinant human IL-8/CXCL8    | 50 ng/ml              | <i>In vitro</i> assay / RPE cells                | R&D systems    |
| 7          | recombinant human IL-10         | 50 ng/ml              | <i>In vitro</i> assay / RPE cells                | R&D systems    |
| 8          | recombinant human IL-12         | 50 ng/ml              | <i>In vitro</i> assay / RPE cells, T cells       | R&D systems    |
| 9          | recombinant human IL-17A/F      | 50 ng/ml              | <i>In vitro</i> assay / RPE cells                | R&D systems    |
| 10         | recombinant human IL-21         | 50 ng/ml              | <i>In vitro</i> assay / RPE cells                | eBioscience    |
| 11         | recombinant human IL-22         | 50 ng/ml              | <i>In vitro</i> assay / RPE cells                | R&D systems    |
| 12         | recombinant human IL-27         | 50 ng/ml              | <i>In vitro</i> assay / RPE cells                | R&D systems    |
| 13         | recombinant human TNF- $\alpha$ | 50 ng/ml              | <i>In vitro</i> assay / RPE cells                | R&D systems    |
| 14         | recombinant human TNFR1         | 50 ng/ml              | <i>In vitro</i> assay / RPE cells                | R&D systems    |
| 15         | recombinant human IFN- $\gamma$ | 0.1, 1, 10, 100 ng/ml | <i>In vitro</i> assay / RPE cells, T cells       | R&D systems    |
| 16         | recombinant human MIG/CXCL9     | 50 ng/ml              | <i>In vitro</i> assay / RPE cells                | R&D systems    |
| 17         | recombinant human MCP-1/CCL2    | 50 ng/ml              | <i>In vitro</i> assay / RPE cells                | R&D systems    |
| 18         | recombinant human GM-CSF        | 50 ng/ml              | <i>In vitro</i> assay / RPE cells                | BD PharMingen  |
| 19         | recombinant human TGF $\beta$ 1 | 50 ng/ml              | <i>In vitro</i> assay / RPE cells                | R&D systems    |
| 20         | recombinant human TGF $\beta$ 2 | 50 ng/ml              | <i>In vitro</i> assay / RPE cells                | R&D systems    |



Sugita S, et al.

|    |                               |                       |                                       |               |
|----|-------------------------------|-----------------------|---------------------------------------|---------------|
| 21 | recombinant human TSP-1       | 50 ng/ml              | <i>In vitro</i> assay / RPE cells     | R&D systems   |
| 22 | recombinant human MIF         | 50 ng/ml              | <i>In vitro</i> assay / RPE cells     | R&D systems   |
| 23 | lipopolysaccharide (LPS)      | 50 ng/ml              | <i>In vitro</i> assay / RPE cells     | Sigma-Aldrich |
| 24 | recombinant human B7-H3/CD276 | 0.5, 5, 20, 200 ng/ml | <i>In vitro</i> assay / T cells, PBMC | R&D systems   |

---

TSP-1: thrombospondin-1; MIF: macrophage migration inhibitory factor.
